# Supplementary material for: Lead-free europium and ytterbium perovskites
Source: Royal Society of Chemistry journal article supplement (doi:10.1039/d3ra03110a), 2023-01-01
Supplement: d3ra03110a1.pdf [file d3ra03110a1.pdf]

# Lead-Free Europium and Ytterbium Perovskites

Chih Shan Tan\*

\*Institute of Electronics, National Yang Ming Chiao Tung University, Hsinchu 30010, Taiwan

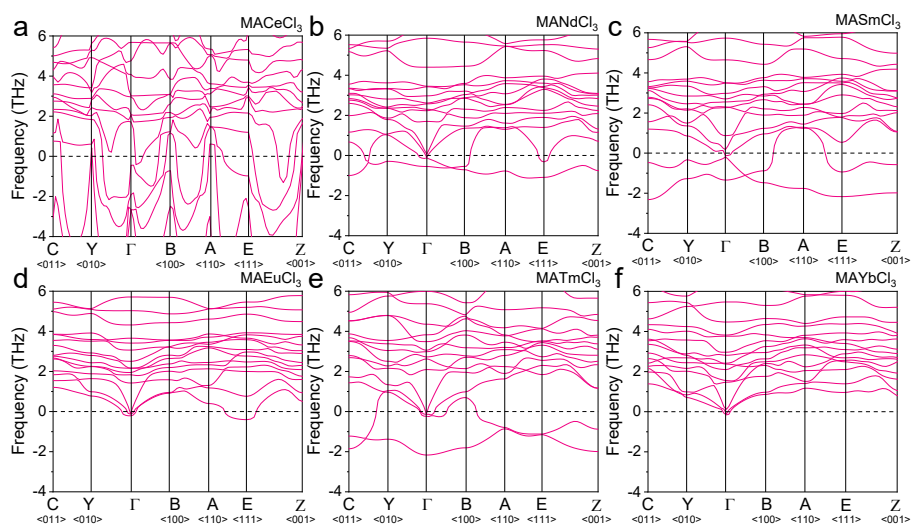

Figure S1. The phonon dispersion diagrams of lanthanide cations in MA-based chloride perovskite.

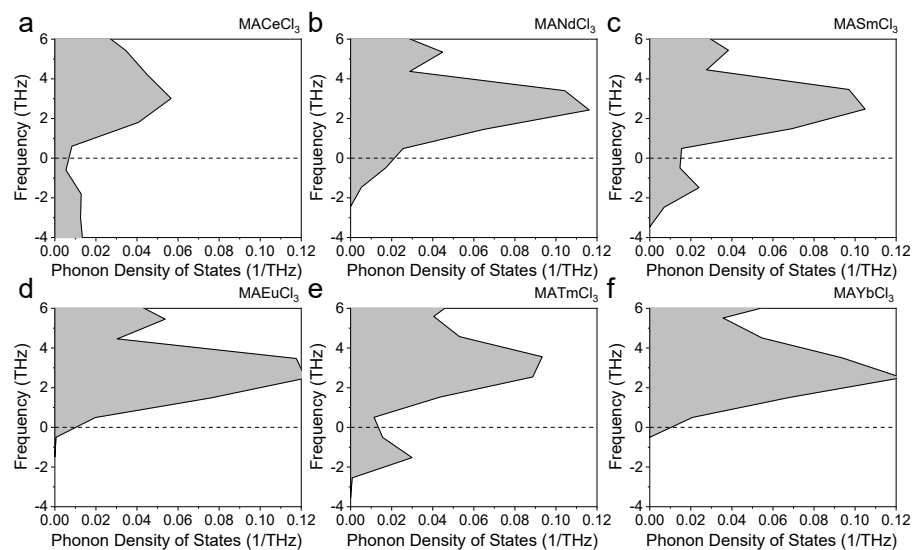

Figure S2. The phonon density of state of lanthanide cations in MA-based chloride perovskite.

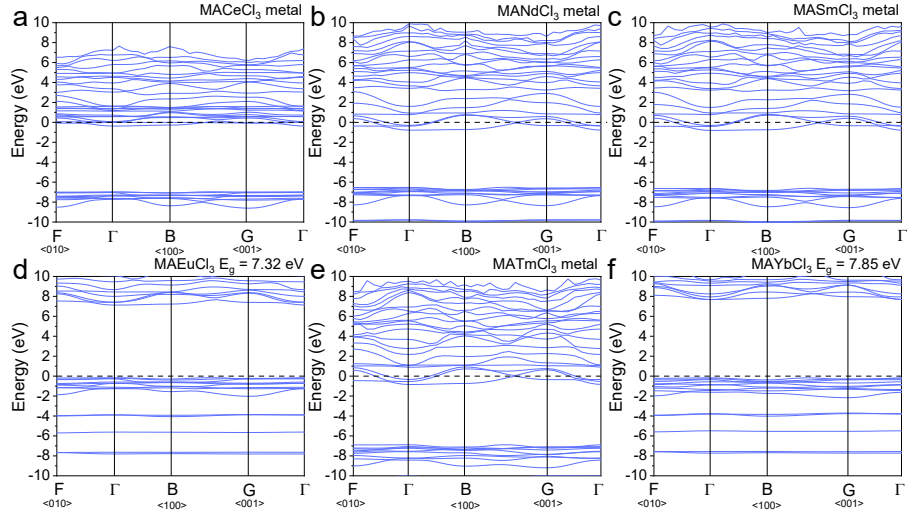

Figure S3. The band structure, without spin-polarized setting, of lanthanide cations in MA-based chloride perovskite.

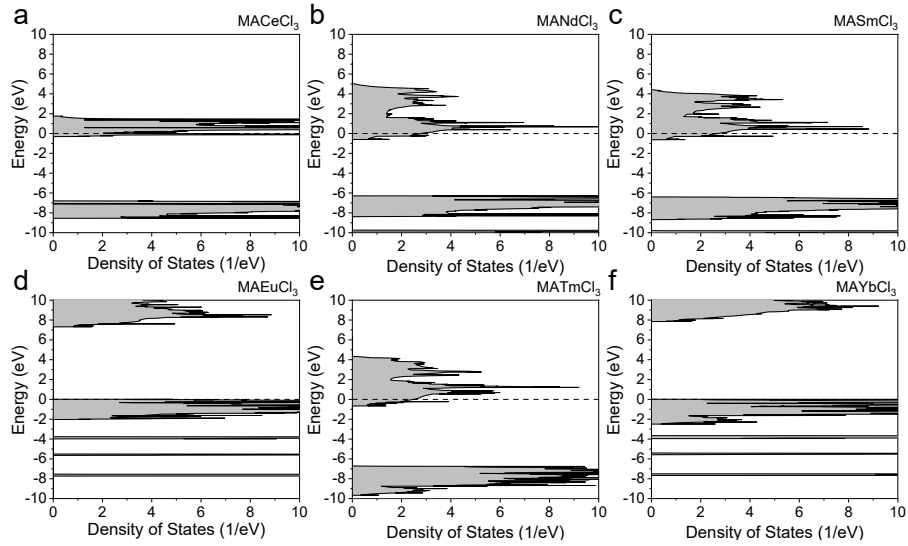

Figure S4. Without a spin-polarized setting, the electron density of the f state of lanthanide cations in MA-based chloride perovskite.

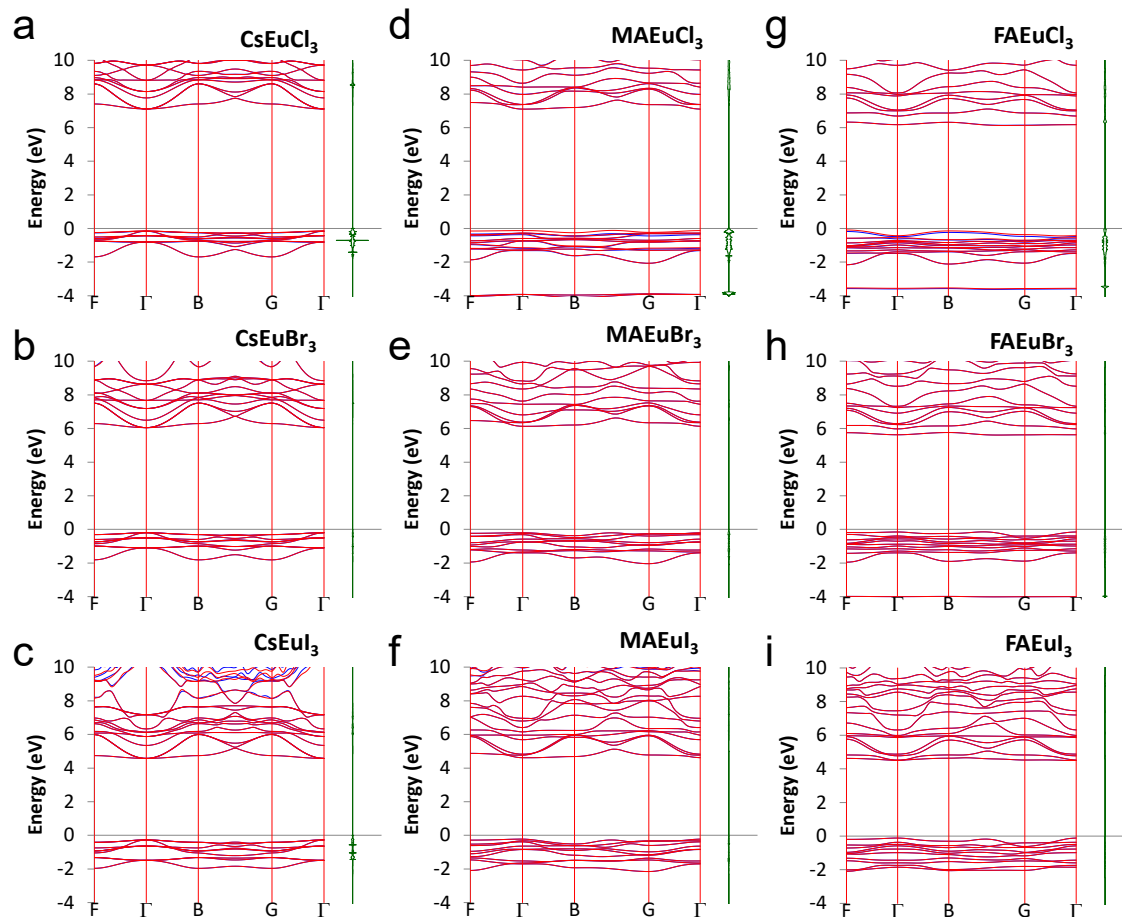

Figure S5. The electronic structure, spin-polarized setting, of the  $\text{Eu}^{2+}$ -based perovskites. (Blue line: spin down, Red line: spin down)

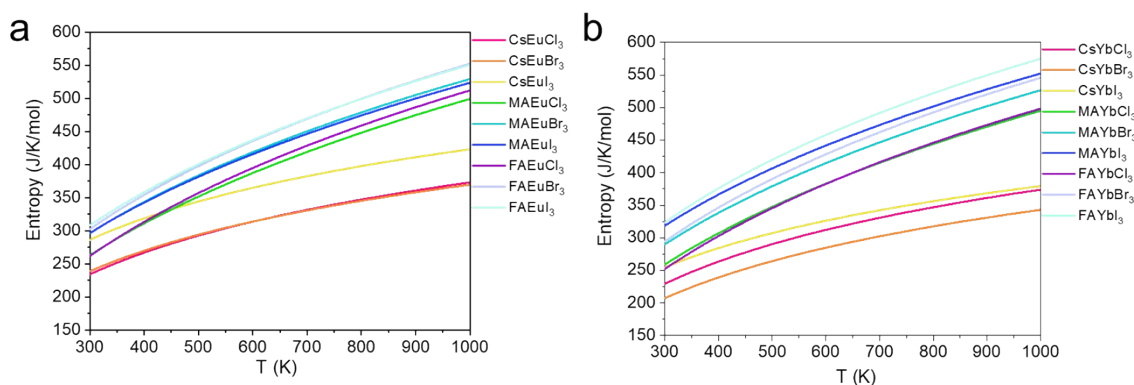

Figure S6. The entropy calculation of (a)  $\text{Eu}^{2+}$  and (b)  $\text{Yb}^{2+}$  cations in perovskite.

Table S1. The electrical conductivity and carrier mobility of CsEuCl<sub>3</sub>, CsEuBr<sub>3</sub>, and CsEuI<sub>3</sub>.

| T (K) | CsEuCl <sub>3</sub>                                          |                                                                     | CsEuBr <sub>3</sub>                                          |                                                                     | CsEuI <sub>3</sub>                                           |                                                                     |
|-------|--------------------------------------------------------------|---------------------------------------------------------------------|--------------------------------------------------------------|---------------------------------------------------------------------|--------------------------------------------------------------|---------------------------------------------------------------------|
|       | Electrical conductivity (ohm <sup>-1</sup> m <sup>-1</sup> ) | Carrier mobility (cm <sup>2</sup> V <sup>-1</sup> s <sup>-1</sup> ) | Electrical conductivity (ohm <sup>-1</sup> m <sup>-1</sup> ) | Carrier mobility (cm <sup>2</sup> V <sup>-1</sup> s <sup>-1</sup> ) | Electrical conductivity (ohm <sup>-1</sup> m <sup>-1</sup> ) | Carrier mobility (cm <sup>2</sup> V <sup>-1</sup> s <sup>-1</sup> ) |
| 300   | 0                                                            | 0                                                                   | 0                                                            | 0                                                                   | -6.99 × 10 <sup>-34</sup>                                    | 0                                                                   |
| 400   | 0                                                            | 0                                                                   | -3.79 × 10 <sup>-34</sup>                                    | 0                                                                   | 2.26 × 10 <sup>-9</sup>                                      | 1.45                                                                |
| 500   | 0                                                            | 0                                                                   | 2.70 × 10 <sup>-10</sup>                                     | 1.11                                                                | 9.55 × 10 <sup>-7</sup>                                      | 1.34                                                                |
| 600   | 6.10 × 10 <sup>-34</sup>                                     | 0                                                                   | 6.14 × 10 <sup>-8</sup>                                      | 1.02                                                                | 5.56 × 10 <sup>-5</sup>                                      | 1.24                                                                |
| 700   | 9.77 × 10 <sup>-31</sup>                                     | 0                                                                   | 3.03 × 10 <sup>-6</sup>                                      | 0.96                                                                | 1.04 × 10 <sup>-3</sup>                                      | 1.17                                                                |
| 800   | 3.66 × 10 <sup>-9</sup>                                      | 0.77                                                                | 5.75 × 10 <sup>-5</sup>                                      | 0.91                                                                | 9.48 × 10 <sup>-3</sup>                                      | 1.10                                                                |
| 900   | 1.07 × 10 <sup>-7</sup>                                      | 0.74                                                                | 5.73 × 10 <sup>-4</sup>                                      | 0.86                                                                | 5.36 × 10 <sup>-2</sup>                                      | 1.04                                                                |
| 1000  | 1.61 × 10 <sup>-5</sup>                                      | 0.71                                                                | 3.64 × 10 <sup>-3</sup>                                      | 0.82                                                                | 0.22                                                         | 0.99                                                                |

Table S2. The electrical conductivity and carrier mobility of MAEuCl<sub>3</sub>, MAEuBr<sub>3</sub>, and MAEuI<sub>3</sub>.

| T (K) | MAEuCl <sub>3</sub>                                          |                                                                     | MAEuBr <sub>3</sub>                                          |                                                                     | MAEuI <sub>3</sub>                                           |                                                                     |
|-------|--------------------------------------------------------------|---------------------------------------------------------------------|--------------------------------------------------------------|---------------------------------------------------------------------|--------------------------------------------------------------|---------------------------------------------------------------------|
|       | Electrical conductivity (ohm <sup>-1</sup> m <sup>-1</sup> ) | Carrier mobility (cm <sup>2</sup> V <sup>-1</sup> s <sup>-1</sup> ) | Electrical conductivity (ohm <sup>-1</sup> m <sup>-1</sup> ) | Carrier mobility (cm <sup>2</sup> V <sup>-1</sup> s <sup>-1</sup> ) | Electrical conductivity (ohm <sup>-1</sup> m <sup>-1</sup> ) | Carrier mobility (cm <sup>2</sup> V <sup>-1</sup> s <sup>-1</sup> ) |
| 300   | 0                                                            | 0                                                                   | 0                                                            | 0                                                                   | -1.25 × 10 <sup>-33</sup>                                    | 0                                                                   |
| 400   | 0                                                            | 0                                                                   | -5.14 × 10 <sup>-35</sup>                                    | 0                                                                   | 2.16 × 10 <sup>-9</sup>                                      | 1.26                                                                |
| 500   | 0                                                            | 0                                                                   | 1.41 × 10 <sup>-10</sup>                                     | 0.72                                                                | 8.37 × 10 <sup>-7</sup>                                      | 1.14                                                                |
| 600   | -4.96 × 10 <sup>-33</sup>                                    | 0                                                                   | 3.32 × 10 <sup>-8</sup>                                      | 0.66                                                                | 4.60 × 10 <sup>-6</sup>                                      | 1.05                                                                |
| 700   | -6.55 × 10 <sup>-31</sup>                                    | 0                                                                   | 1.67 × 10 <sup>-6</sup>                                      | 0.62                                                                | 8.24 × 10 <sup>-4</sup>                                      | 0.98                                                                |
| 800   | 2.37 × 10 <sup>-9</sup>                                      | 0.38                                                                | 3.19 × 10 <sup>-5</sup>                                      | 0.58                                                                | 7.29 × 10 <sup>-3</sup>                                      | 0.93                                                                |
| 900   | 6.74 × 10 <sup>-8</sup>                                      | 0.36                                                                | 3.19 × 10 <sup>-4</sup>                                      | 0.55                                                                | 0.04                                                         | 0.88                                                                |
| 1000  | 9.85 × 10 <sup>-7</sup>                                      | 0.34                                                                | 2.03 × 10 <sup>-3</sup>                                      | 0.52                                                                | 0.16                                                         | 0.84                                                                |

Table S3. The electrical conductivity and carrier mobility of FAEuCl<sub>3</sub>, FAEuBr<sub>3</sub>, and FAEuI<sub>3</sub>.

| T (K) | FAEuCl <sub>3</sub>                                          |                                                                     | FAEuBr <sub>3</sub>                                          |                                                                     | FAEuI <sub>3</sub>                                           |                                                                     |
|-------|--------------------------------------------------------------|---------------------------------------------------------------------|--------------------------------------------------------------|---------------------------------------------------------------------|--------------------------------------------------------------|---------------------------------------------------------------------|
|       | Electrical conductivity (ohm <sup>-1</sup> m <sup>-1</sup> ) | Carrier mobility (cm <sup>2</sup> V <sup>-1</sup> s <sup>-1</sup> ) | Electrical conductivity (ohm <sup>-1</sup> m <sup>-1</sup> ) | Carrier mobility (cm <sup>2</sup> V <sup>-1</sup> s <sup>-1</sup> ) | Electrical conductivity (ohm <sup>-1</sup> m <sup>-1</sup> ) | Carrier mobility (cm <sup>2</sup> V <sup>-1</sup> s <sup>-1</sup> ) |
| 300   | 0                                                            | 0                                                                   | 0                                                            | 0                                                                   | -9.64 × 10 <sup>-36</sup>                                    | 0                                                                   |
| 400   | 0                                                            | 0                                                                   | -3.22 × 10 <sup>-33</sup>                                    | 0                                                                   | 4.20 × 10 <sup>-10</sup>                                     | 1.24                                                                |
| 500   | -4.17 × 10 <sup>-35</sup>                                    | 0                                                                   | 5.23 × 10 <sup>-10</sup>                                     | 0.43                                                                | 2.12 × 10 <sup>-7</sup>                                      | 1.00                                                                |
| 600   | -1.39 × 10 <sup>-30</sup>                                    | 0                                                                   | 9.47 × 10 <sup>-8</sup>                                      | 0.36                                                                | 1.42 × 10 <sup>-5</sup>                                      | 0.86                                                                |
| 700   | 8.69 × 10 <sup>-9</sup>                                      | 0.35                                                                | 3.98 × 10 <sup>-6</sup>                                      | 0.31                                                                | 2.98 × 10 <sup>-4</sup>                                      | 0.78                                                                |
| 800   | 3.30 × 10 <sup>-7</sup>                                      | 0.32                                                                | 6.65 × 10 <sup>-5</sup>                                      | 0.27                                                                | 2.99 × 10 <sup>-3</sup>                                      | 0.72                                                                |
| 900   | 5.60 × 10 <sup>-6</sup>                                      | 0.30                                                                | 6.01 × 10 <sup>-4</sup>                                      | 0.24                                                                | 0.02                                                         | 0.68                                                                |
| 1000  | 5.38 × 10 <sup>-5</sup>                                      | 0.27                                                                | 3.53 × 10 <sup>-3</sup>                                      | 0.22                                                                | 0.08                                                         | 0.64                                                                |

Table S4. The electrical conductivity and carrier mobility of CsYbCl<sub>3</sub>, CsYbBr<sub>3</sub>, and CsYbI<sub>3</sub>.

| T (K) | CsYbCl <sub>3</sub>                                          |                                                                     | CsYbBr <sub>3</sub>                                          |                                                                     | CsYbI <sub>3</sub>                                           |                                                                     |
|-------|--------------------------------------------------------------|---------------------------------------------------------------------|--------------------------------------------------------------|---------------------------------------------------------------------|--------------------------------------------------------------|---------------------------------------------------------------------|
|       | Electrical conductivity (ohm <sup>-1</sup> m <sup>-1</sup> ) | Carrier mobility (cm <sup>2</sup> V <sup>-1</sup> s <sup>-1</sup> ) | Electrical conductivity (ohm <sup>-1</sup> m <sup>-1</sup> ) | Carrier mobility (cm <sup>2</sup> V <sup>-1</sup> s <sup>-1</sup> ) | Electrical conductivity (ohm <sup>-1</sup> m <sup>-1</sup> ) | Carrier mobility (cm <sup>2</sup> V <sup>-1</sup> s <sup>-1</sup> ) |
| 300   | 0                                                            | 0                                                                   | 0                                                            | 0                                                                   | 0                                                            | 0                                                                   |
| 400   | 0                                                            | 0                                                                   | 0                                                            | 0                                                                   | 0                                                            | 0                                                                   |
| 500   | 0                                                            | 0                                                                   | 0                                                            | 0                                                                   | -2.08 × 10 <sup>-32</sup>                                    | 0                                                                   |
| 600   | 0                                                            | 0                                                                   | -1.44 × 10 <sup>-31</sup>                                    | 0                                                                   | 6.99 × 10 <sup>-10</sup>                                     | 1.35                                                                |
| 700   | 0                                                            | 0                                                                   | 1.52 × 10 <sup>-9</sup>                                      | 1.88                                                                | 6.57 × 10 <sup>-8</sup>                                      | 1.26                                                                |
| 800   | 0                                                            | 0                                                                   | 8.12 × 10 <sup>-8</sup>                                      | 1.82                                                                | 2.02 × 10 <sup>-6</sup>                                      | 1.19                                                                |
| 900   | -4.08 × 10 <sup>-32</sup>                                    | 0                                                                   | 1.82 × 10 <sup>-6</sup>                                      | 1.76                                                                | 2.93 × 10 <sup>-5</sup>                                      | 1.12                                                                |
| 1000  | -2.17 × 10 <sup>-30</sup>                                    | 0                                                                   | 2.21 × 10 <sup>-5</sup>                                      | 1.70                                                                | 2.52 × 10 <sup>-4</sup>                                      | 1.06                                                                |
| 1100  | 2.37 × 10 <sup>-9</sup>                                      | 0.61                                                                | 1.72 × 10 <sup>-4</sup>                                      | 1.66                                                                | 1.48 × 10 <sup>-3</sup>                                      | 1.00                                                                |

Table S5. The electrical conductivity and carrier mobility of MAYbCl<sub>3</sub>, MAYbBr<sub>3</sub>, and MAYbI<sub>3</sub>.

| T (K) | MAYbCl <sub>3</sub>                                          |                                                                     | MAYbBr <sub>3</sub>                                          |                                                                     | MAYbI <sub>3</sub>                                           |                                                                     |
|-------|--------------------------------------------------------------|---------------------------------------------------------------------|--------------------------------------------------------------|---------------------------------------------------------------------|--------------------------------------------------------------|---------------------------------------------------------------------|
|       | Electrical conductivity (ohm <sup>-1</sup> m <sup>-1</sup> ) | Carrier mobility (cm <sup>2</sup> V <sup>-1</sup> s <sup>-1</sup> ) | Electrical conductivity (ohm <sup>-1</sup> m <sup>-1</sup> ) | Carrier mobility (cm <sup>2</sup> V <sup>-1</sup> s <sup>-1</sup> ) | Electrical conductivity (ohm <sup>-1</sup> m <sup>-1</sup> ) | Carrier mobility (cm <sup>2</sup> V <sup>-1</sup> s <sup>-1</sup> ) |
| 300   | 0                                                            | 0                                                                   | 0                                                            | 0                                                                   | 0                                                            | 0                                                                   |
| 400   | 0                                                            | 0                                                                   | 0                                                            | 0                                                                   | 0                                                            | 0                                                                   |
| 500   | 0                                                            | 0                                                                   | 0                                                            | 0                                                                   | -2.43 × 10 <sup>-32</sup>                                    | 0                                                                   |
| 600   | 0                                                            | 0                                                                   | 0                                                            | 0                                                                   | 6.64 × 10 <sup>-10</sup>                                     | 1.16                                                                |
| 700   | 0                                                            | 0                                                                   | -3.53 × 10 <sup>-33</sup>                                    | 0                                                                   | 5.75 × 10 <sup>-8</sup>                                      | 1.07                                                                |
| 800   | 0                                                            | 0                                                                   | -8.18 × 10 <sup>-31</sup>                                    | 0                                                                   | 1.67 × 10 <sup>-6</sup>                                      | 0.99                                                                |
| 900   | -1.39 × 10 <sup>-32</sup>                                    | 0                                                                   | 1.84 × 10 <sup>-9</sup>                                      | 0.55                                                                | 2.33 × 10 <sup>-5</sup>                                      | 0.93                                                                |
| 1000  | -8.18 × 10 <sup>-31</sup>                                    | 0                                                                   | 3.94 × 10 <sup>-8</sup>                                      | 0.52                                                                | 1.95 × 10 <sup>-4</sup>                                      | 0.87                                                                |
| 1100  | 9.21 × 10 <sup>-10</sup>                                     | 0.32                                                                | 4.88 × 10 <sup>-7</sup>                                      | 0.50                                                                | 1.12 × 10 <sup>-3</sup>                                      | 0.83                                                                |

Table S6. The electrical conductivity and carrier mobility of FAYbCl<sub>3</sub>, FAYbBr<sub>3</sub>, and FAYbI<sub>3</sub>.

| T (K) | FAYbCl <sub>3</sub>                                          |                                                                     | FAYbBr <sub>3</sub>                                          |                                                                     | FAYbI <sub>3</sub>                                           |                                                                     |
|-------|--------------------------------------------------------------|---------------------------------------------------------------------|--------------------------------------------------------------|---------------------------------------------------------------------|--------------------------------------------------------------|---------------------------------------------------------------------|
|       | Electrical conductivity (ohm <sup>-1</sup> m <sup>-1</sup> ) | Carrier mobility (cm <sup>2</sup> V <sup>-1</sup> s <sup>-1</sup> ) | Electrical conductivity (ohm <sup>-1</sup> m <sup>-1</sup> ) | Carrier mobility (cm <sup>2</sup> V <sup>-1</sup> s <sup>-1</sup> ) | Electrical conductivity (ohm <sup>-1</sup> m <sup>-1</sup> ) | Carrier mobility (cm <sup>2</sup> V <sup>-1</sup> s <sup>-1</sup> ) |
| 300   | 0                                                            | 0                                                                   | 0                                                            | 0                                                                   | 0                                                            | 0                                                                   |
| 400   | 0                                                            | 0                                                                   | 0                                                            | 0                                                                   | 0                                                            | 0                                                                   |
| 500   | 0                                                            | 0                                                                   | 0                                                            | 0                                                                   | -6.25 × 10 <sup>-32</sup>                                    | 0                                                                   |
| 600   | 0                                                            | 0                                                                   | -1.50 × 10 <sup>-32</sup>                                    | 0                                                                   | 1.40 × 10 <sup>-9</sup>                                      | 0.92                                                                |
| 700   | -3.88 × 10 <sup>-32</sup>                                    | 0                                                                   | 2.00 × 10 <sup>-10</sup>                                     | 0.36                                                                | 1.10 × 10 <sup>-7</sup>                                      | 0.82                                                                |
| 800   | 2.34 × 10 <sup>-10</sup>                                     | 0.30                                                                | 1.17 × 10 <sup>-8</sup>                                      | 0.31                                                                | 2.99 × 10 <sup>-6</sup>                                      | 0.75                                                                |
| 900   | 9.09 × 10 <sup>-9</sup>                                      | 0.27                                                                | 2.81 × 10 <sup>-7</sup>                                      | 0.27                                                                | 3.95 × 10 <sup>-5</sup>                                      | 0.69                                                                |
| 1000  | 1.70 × 10 <sup>-7</sup>                                      | 0.24                                                                | 3.59 × 10 <sup>-6</sup>                                      | 0.23                                                                | 3.15 × 10 <sup>-4</sup>                                      | 0.65                                                                |
| 1100  | 1.86 × 10 <sup>-6</sup>                                      | 0.22                                                                | 2.90 × 10 <sup>-5</sup>                                      | 0.21                                                                | 1.74 × 10 <sup>-3</sup>                                      | 0.62                                                                |

## Crystal information

Title CH<sub>6</sub>NCeCl<sub>3</sub> (MACeCl<sub>3</sub>)

Space group name *P*<sub>1</sub>

Lattice parameters

a b c alpha beta gamma

5.59058 5.60133 5.71131 90.0000 89.1600 90.0000

Unit-cell volume = 178.828635 Å<sup>3</sup>

Structure parameters

|                    | x       | y       | z       | Occ.  | B     | Site | Sym. |
|--------------------|---------|---------|---------|-------|-------|------|------|
| 1 H H <sub>1</sub> | 0.35093 | 0.51930 | 0.64410 | 1.000 | 1.000 | 1a   | 1    |
| 2 H H <sub>2</sub> | 0.35093 | 0.82054 | 0.64410 | 1.000 | 1.000 | 1a   | 1    |

|       |                 |         |         |         |       |       |    |   |
|-------|-----------------|---------|---------|---------|-------|-------|----|---|
| 3 H   | H <sub>3</sub>  | 0.92203 | 0.50939 | 0.71293 | 1.000 | 1.000 | 1a | 1 |
| 4 H   | H <sub>4</sub>  | 0.92203 | 0.83046 | 0.71293 | 1.000 | 1.000 | 1a | 1 |
| 5 H   | H <sub>5</sub>  | 0.28590 | 0.66992 | 0.88716 | 1.000 | 1.000 | 1a | 1 |
| 6 H   | H <sub>6</sub>  | 0.99594 | 0.66992 | 0.45003 | 1.000 | 1.000 | 1a | 1 |
| 7 Ce  | Ce <sub>1</sub> | 0.58011 | 0.16992 | 0.14834 | 1.000 | 1.000 | 1a | 1 |
| 8 C   | C               | 0.00862 | 0.66992 | 0.64073 | 1.000 | 1.000 | 1a | 1 |
| 9 N   | N               | 0.26175 | 0.66992 | 0.70751 | 1.000 | 1.000 | 1a | 1 |
| 10 Cl | Cl <sub>1</sub> | 0.54954 | 0.16992 | 0.64279 | 1.000 | 1.000 | 1a | 1 |
| 11 Cl | Cl <sub>2</sub> | 0.54851 | 0.66992 | 0.17965 | 1.000 | 1.000 | 1a | 1 |
| 12 Cl | Cl <sub>3</sub> | 0.07921 | 0.16992 | 0.11311 | 1.000 | 1.000 | 1a | 1 |

=====  
Title CH<sub>6</sub>NEuCl<sub>3</sub> (MAEuCl<sub>3</sub>)

Space group name *P*<sub>1</sub>

Lattice parameters

| a       | b       | c       | alpha   | beta    | gamma   |
|---------|---------|---------|---------|---------|---------|
| 5.50847 | 5.47507 | 5.61640 | 90.0000 | 87.5800 | 90.0000 |

Unit-cell volume = 169.235389 Å<sup>3</sup>

Structure parameters

|      | x               | y       | z       | Occ.    | B     | Site  | Sym. |   |
|------|-----------------|---------|---------|---------|-------|-------|------|---|
| 1 H  | H <sub>1</sub>  | 0.35063 | 0.51503 | 0.68662 | 1.000 | 1.000 | 1a   | 1 |
| 2 H  | H <sub>2</sub>  | 0.35063 | 0.82481 | 0.68662 | 1.000 | 1.000 | 1a   | 1 |
| 3 H  | H <sub>3</sub>  | 0.91129 | 0.50522 | 0.65929 | 1.000 | 1.000 | 1a   | 1 |
| 4 H  | H <sub>4</sub>  | 0.91129 | 0.83462 | 0.65929 | 1.000 | 1.000 | 1a   | 1 |
| 5 H  | H <sub>5</sub>  | 0.22277 | 0.66992 | 0.91431 | 1.000 | 1.000 | 1a   | 1 |
| 6 H  | H <sub>6</sub>  | 0.05413 | 0.66992 | 0.41421 | 1.000 | 1.000 | 1a   | 1 |
| 7 Eu | Eu <sub>1</sub> | 0.58835 | 0.16992 | 0.15991 | 1.000 | 1.000 | 1a   | 1 |
| 8 C  | C               | 0.01472 | 0.66992 | 0.60755 | 1.000 | 1.000 | 1a   | 1 |
| 9 N  | N               | 0.24657 | 0.66992 | 0.73019 | 1.000 | 1.000 | 1a   | 1 |

|    |    |                 |         |         |         |       |       |    |   |
|----|----|-----------------|---------|---------|---------|-------|-------|----|---|
| 10 | Cl | Cl <sub>1</sub> | 0.55793 | 0.16992 | 0.65840 | 1.000 | 1.000 | 1a | 1 |
| 11 | Cl | Cl <sub>2</sub> | 0.56051 | 0.66992 | 0.19094 | 1.000 | 1.000 | 1a | 1 |
| 12 | Cl | Cl <sub>3</sub> | 0.08666 | 0.16992 | 0.11605 | 1.000 | 1.000 | 1a | 1 |

---

Title CH<sub>6</sub>NNdCl<sub>3</sub> (MANdCl<sub>3</sub>)

Space group name *P*<sub>1</sub>

Lattice parameters

|         |         |         |         |         |         |
|---------|---------|---------|---------|---------|---------|
| a       | b       | c       | alpha   | beta    | gamma   |
| 5.49908 | 5.54919 | 5.59087 | 90.0000 | 87.1600 | 90.0000 |

Unit-cell volume = 170.398319 Å<sup>3</sup>

Structure parameters

|    |                    | x       | y       | z       | Occ.  | B     | Site | Sym. |
|----|--------------------|---------|---------|---------|-------|-------|------|------|
| 1  | H H <sub>1</sub>   | 0.35615 | 0.51785 | 0.62815 | 1.000 | 1.000 | 1a   | 1    |
| 2  | H H <sub>2</sub>   | 0.35615 | 0.82199 | 0.62815 | 1.000 | 1.000 | 1a   | 1    |
| 3  | H H <sub>3</sub>   | 0.91694 | 0.50754 | 0.71050 | 1.000 | 1.000 | 1a   | 1    |
| 4  | H H <sub>4</sub>   | 0.91694 | 0.83231 | 0.71050 | 1.000 | 1.000 | 1a   | 1    |
| 5  | H H <sub>5</sub>   | 0.28852 | 0.66992 | 0.88028 | 1.000 | 1.000 | 1a   | 1    |
| 6  | H H <sub>6</sub>   | 0.99719 | 0.66992 | 0.43950 | 1.000 | 1.000 | 1a   | 1    |
| 7  | Nd Nd <sub>1</sub> | 0.56835 | 0.16992 | 0.16363 | 1.000 | 1.000 | 1a   | 1    |
| 8  | C C                | 0.00644 | 0.66992 | 0.63535 | 1.000 | 1.000 | 1a   | 1    |
| 9  | N N                | 0.26447 | 0.66992 | 0.69647 | 1.000 | 1.000 | 1a   | 1    |
| 10 | Cl Cl <sub>1</sub> | 0.55993 | 0.16992 | 0.66357 | 1.000 | 1.000 | 1a   | 1    |
| 11 | Cl Cl <sub>2</sub> | 0.55572 | 0.66992 | 0.17186 | 1.000 | 1.000 | 1a   | 1    |
| 12 | Cl Cl <sub>3</sub> | 0.06870 | 0.16992 | 0.15539 | 1.000 | 1.000 | 1a   | 1    |

---

Title CH<sub>6</sub>NSmCl<sub>3</sub> (MASmCl<sub>3</sub>)

Space group name *P*<sub>1</sub>

Lattice parameters

| a       | b       | c       | alpha   | beta    | gamma   |
|---------|---------|---------|---------|---------|---------|
| 5.44183 | 5.48218 | 5.51968 | 90.0000 | 86.7300 | 90.0000 |

Unit-cell volume = 164.401018 Å<sup>3</sup>

Structure parameters

|    |                    | x       | y       | z       | Occ.  | B     | Site | Sym. |
|----|--------------------|---------|---------|---------|-------|-------|------|------|
| 1  | H H <sub>1</sub>   | 0.35618 | 0.51615 | 0.63033 | 1.000 | 1.000 | 1a   | 1    |
| 2  | H H <sub>2</sub>   | 0.35618 | 0.82369 | 0.63033 | 1.000 | 1.000 | 1a   | 1    |
| 3  | H H <sub>3</sub>   | 0.91172 | 0.50557 | 0.70968 | 1.000 | 1.000 | 1a   | 1    |
| 4  | H H <sub>4</sub>   | 0.91172 | 0.83428 | 0.70968 | 1.000 | 1.000 | 1a   | 1    |
| 5  | H H <sub>5</sub>   | 0.28323 | 0.66992 | 0.88509 | 1.000 | 1.000 | 1a   | 1    |
| 6  | H H <sub>6</sub>   | 0.99706 | 0.66992 | 0.43552 | 1.000 | 1.000 | 1a   | 1    |
| 7  | Sm Sm <sub>1</sub> | 0.57320 | 0.16992 | 0.16259 | 1.000 | 1.000 | 1a   | 1    |
| 8  | C C                | 0.00309 | 0.66992 | 0.63407 | 1.000 | 1.000 | 1a   | 1    |
| 9  | N N                | 0.26215 | 0.66992 | 0.69865 | 1.000 | 1.000 | 1a   | 1    |
| 10 | Cl Cl <sub>1</sub> | 0.56456 | 0.16992 | 0.66250 | 1.000 | 1.000 | 1a   | 1    |
| 11 | Cl Cl <sub>2</sub> | 0.56258 | 0.66992 | 0.17131 | 1.000 | 1.000 | 1a   | 1    |
| 12 | Cl Cl <sub>3</sub> | 0.07381 | 0.16992 | 0.15361 | 1.000 | 1.000 | 1a   | 1    |

Title CH<sub>6</sub>NTmCl<sub>3</sub> (MATmCl<sub>3</sub>)

Space group name *P*<sub>1</sub>

Lattice parameters

| a       | b       | c       | alpha   | beta    | gamma   |
|---------|---------|---------|---------|---------|---------|
| 5.30155 | 5.32332 | 5.32963 | 90.0000 | 84.4100 | 90.0000 |

Unit-cell volume = 149.696699 Å<sup>3</sup>

Structure parameters

|   |                  | x       | y       | z       | Occ.  | B     | Site | Sym. |
|---|------------------|---------|---------|---------|-------|-------|------|------|
| 1 | H H <sub>1</sub> | 0.35863 | 0.51170 | 0.65161 | 1.000 | 1.000 | 1a   | 1    |
| 2 | H H <sub>2</sub> | 0.35863 | 0.82814 | 0.65161 | 1.000 | 1.000 | 1a   | 1    |



|    |    |                 |         |         |         |       |       |    |   |
|----|----|-----------------|---------|---------|---------|-------|-------|----|---|
| 3  | H  | H <sub>3</sub>  | 0.90046 | 0.50070 | 0.68803 | 1.000 | 1.000 | 1a | 1 |
| 4  | H  | H <sub>4</sub>  | 0.90046 | 0.83915 | 0.68803 | 1.000 | 1.000 | 1a | 1 |
| 5  | H  | H <sub>5</sub>  | 0.24528 | 0.66992 | 0.90812 | 1.000 | 1.000 | 1a | 1 |
| 6  | H  | H <sub>6</sub>  | 0.02835 | 0.66992 | 0.41127 | 1.000 | 1.000 | 1a | 1 |
| 7  | Tm | Tm <sub>1</sub> | 0.57800 | 0.16992 | 0.16369 | 1.000 | 1.000 | 1a | 1 |
| 8  | C  | C               | 0.00320 | 0.66992 | 0.61831 | 1.000 | 1.000 | 1a | 1 |
| 9  | N  | N               | 0.25388 | 0.66992 | 0.71321 | 1.000 | 1.000 | 1a | 1 |
| 10 | Cl | Cl <sub>1</sub> | 0.57409 | 0.16992 | 0.66452 | 1.000 | 1.000 | 1a | 1 |
| 11 | Cl | Cl <sub>2</sub> | 0.57484 | 0.66992 | 0.17283 | 1.000 | 1.000 | 1a | 1 |
| 12 | Cl | Cl <sub>3</sub> | 0.07969 | 0.16992 | 0.15212 | 1.000 | 1.000 | 1a | 1 |

=====  
Title           CH<sub>6</sub>NYbCl<sub>3</sub> (MAYbCl<sub>3</sub>)

Space group name   *P*<sub>1</sub>

Lattice parameters

| a       | b       | c       | alpha   | beta    | gamma   |
|---------|---------|---------|---------|---------|---------|
| 5.37451 | 5.33509 | 5.45456 | 90.0000 | 86.4500 | 90.0000 |

Unit-cell volume = 156.101178 Å<sup>3</sup>

Structure parameters

|   |    | x               | y       | z       | Occ.    | B     | Site  | Sym. |   |
|---|----|-----------------|---------|---------|---------|-------|-------|------|---|
| 1 | H  | H <sub>1</sub>  | 0.34648 | 0.51110 | 0.70677 | 1.000 | 1.000 | 1a   | 1 |
| 2 | H  | H <sub>2</sub>  | 0.34648 | 0.82875 | 0.70677 | 1.000 | 1.000 | 1a   | 1 |
| 3 | H  | H <sub>3</sub>  | 0.90493 | 0.50073 | 0.63589 | 1.000 | 1.000 | 1a   | 1 |
| 4 | H  | H <sub>4</sub>  | 0.90493 | 0.83911 | 0.63589 | 1.000 | 1.000 | 1a   | 1 |
| 5 | H  | H <sub>5</sub>  | 0.18811 | 0.66992 | 0.92872 | 1.000 | 1.000 | 1a   | 1 |
| 6 | H  | H <sub>6</sub>  | 0.07994 | 0.66992 | 0.39879 | 1.000 | 1.000 | 1a   | 1 |
| 7 | Yb | Yb <sub>1</sub> | 0.59344 | 0.16992 | 0.16280 | 1.000 | 1.000 | 1a   | 1 |
| 8 | C  | C               | 0.01586 | 0.66992 | 0.59366 | 1.000 | 1.000 | 1a   | 1 |
| 9 | N  | N               | 0.23573 | 0.66992 | 0.74219 | 1.000 | 1.000 | 1a   | 1 |

|    |    |                 |         |         |         |       |       |    |   |
|----|----|-----------------|---------|---------|---------|-------|-------|----|---|
| 10 | Cl | Cl <sub>1</sub> | 0.56231 | 0.16992 | 0.66077 | 1.000 | 1.000 | 1a | 1 |
| 11 | Cl | Cl <sub>2</sub> | 0.58566 | 0.66992 | 0.17794 | 1.000 | 1.000 | 1a | 1 |
| 12 | Cl | Cl <sub>3</sub> | 0.09163 | 0.16992 | 0.13317 | 1.000 | 1.000 | 1a | 1 |

---

D:\升等發表文章\Paper 8 Lanthanide Cations for Lead-Free Perovskite\crystal structure\after Geo\CsEuBr3 PBEsol opt.cif

---

Title CsEuBr<sub>3</sub>

Space group name *P*<sub>1</sub>

Lattice parameters

| a       | b       | c       | alpha   | beta    | gamma   |
|---------|---------|---------|---------|---------|---------|
| 5.75496 | 5.75496 | 5.75507 | 90.0000 | 89.9800 | 90.0000 |

Unit-cell volume = 190.605412 Å<sup>3</sup>

Structure parameters

|   |    |                 | x       | y       | z       | Occ.  | B     | Site | Sym. |
|---|----|-----------------|---------|---------|---------|-------|-------|------|------|
| 1 | Eu | Eu <sub>1</sub> | 0.49997 | 0.25000 | 0.25142 | 1.000 | 1.000 | 1a   | 1    |
| 2 | Cs | Cs              | 0.00002 | 0.75000 | 0.74770 | 1.000 | 1.000 | 1a   | 1    |
| 3 | Br | Br <sub>1</sub> | 0.50001 | 0.25000 | 0.75163 | 1.000 | 1.000 | 1a   | 1    |
| 4 | Br | Br <sub>2</sub> | 0.49997 | 0.75000 | 0.24890 | 1.000 | 1.000 | 1a   | 1    |
| 5 | Br | Br <sub>3</sub> | 0.99996 | 0.25000 | 0.24894 | 1.000 | 1.000 | 1a   | 1    |

---

Title CsEuCl<sub>3</sub>

Space group name *P*<sub>1</sub>

Lattice parameters

| a       | b       | c       | alpha   | beta    | gamma   |
|---------|---------|---------|---------|---------|---------|
| 5.46914 | 5.46920 | 5.46946 | 90.0000 | 89.9800 | 90.0000 |

Unit-cell volume = 163.601502 Å<sup>3</sup>

Structure parameters

|   |                    | x       | y       | z       | Occ.  | B     | Site | Sym. |
|---|--------------------|---------|---------|---------|-------|-------|------|------|
| 1 | Eu Eu <sub>1</sub> | 0.49997 | 0.25000 | 0.25139 | 1.000 | 1.000 | 1a   | 1    |
| 2 | Cs Cs              | 0.00002 | 0.75000 | 0.74766 | 1.000 | 1.000 | 1a   | 1    |
| 3 | Cl Cl <sub>1</sub> | 0.50001 | 0.25000 | 0.75142 | 1.000 | 1.000 | 1a   | 1    |
| 4 | Cl Cl <sub>2</sub> | 0.49997 | 0.75000 | 0.24905 | 1.000 | 1.000 | 1a   | 1    |
| 5 | Cl Cl <sub>3</sub> | 0.99997 | 0.25000 | 0.24908 | 1.000 | 1.000 | 1a   | 1    |

---

Title CsEuI<sub>3</sub>

Space group name  $P_1$

Lattice parameters

| a       | b       | c       | alpha   | beta    | gamma   |
|---------|---------|---------|---------|---------|---------|
| 6.19868 | 6.19861 | 6.19865 | 90.0000 | 89.9800 | 90.0000 |

Unit-cell volume = 238.171939 Å<sup>3</sup>

Structure parameters

|   |                    | x       | y       | z       | Occ.  | B     | Site | Sym. |
|---|--------------------|---------|---------|---------|-------|-------|------|------|
| 1 | Eu Eu <sub>1</sub> | 0.49997 | 0.25000 | 0.25204 | 1.000 | 1.000 | 1a   | 1    |
| 2 | Cs Cs              | 0.00001 | 0.75000 | 0.74782 | 1.000 | 1.000 | 1a   | 1    |
| 3 | I I <sub>1</sub>   | 0.50002 | 0.25000 | 0.75169 | 1.000 | 1.000 | 1a   | 1    |
| 4 | I I <sub>3</sub>   | 0.49997 | 0.75000 | 0.24851 | 1.000 | 1.000 | 1a   | 1    |
| 5 | I I <sub>2</sub>   | 0.99996 | 0.25000 | 0.24854 | 1.000 | 1.000 | 1a   | 1    |

---

Title CH<sub>5</sub>N<sub>2</sub>EuBr<sub>3</sub> (FAEuBr<sub>3</sub>)

Space group name  $P_1$

Lattice parameters

| a       | b       | c       | alpha   | beta    | gamma   |
|---------|---------|---------|---------|---------|---------|
| 5.89446 | 5.87872 | 5.84302 | 86.0600 | 83.8400 | 86.9600 |

Unit-cell volume = 200.613908 Å<sup>3</sup>

Structure parameters

|    |                    | x       | y       | z       | Occ.  | B     | Site | Sym. |
|----|--------------------|---------|---------|---------|-------|-------|------|------|
| 1  | H H <sub>1</sub>   | 0.60717 | 0.85373 | 0.23473 | 1.000 | 1.000 | 1a   | 1    |
| 2  | H H <sub>2</sub>   | 0.48277 | 0.09877 | 0.36832 | 1.000 | 1.000 | 1a   | 1    |
| 3  | H H <sub>4</sub>   | 0.18025 | 0.12843 | 0.14040 | 1.000 | 1.000 | 1a   | 1    |
| 4  | Eu Eu <sub>1</sub> | 0.87636 | 0.43280 | 0.61440 | 1.000 | 1.000 | 1a   | 1    |
| 5  | C C                | 0.31173 | 0.98956 | 0.11719 | 1.000 | 1.000 | 1a   | 1    |
| 6  | N N                | 0.47931 | 0.97934 | 0.24800 | 1.000 | 1.000 | 1a   | 1    |
| 7  | Br Br <sub>1</sub> | 0.83750 | 0.46323 | 0.11589 | 1.000 | 1.000 | 1a   | 1    |
| 8  | Br Br <sub>2</sub> | 0.87546 | 0.93334 | 0.61364 | 1.000 | 1.000 | 1a   | 1    |
| 9  | Br Br <sub>3</sub> | 0.37560 | 0.41173 | 0.61280 | 1.000 | 1.000 | 1a   | 1    |
| 10 | N N <sub>2</sub>   | 0.28799 | 0.84482 | 0.96187 | 1.000 | 1.000 | 1a   | 1    |
| 11 | H H <sub>6</sub>   | 0.40186 | 0.70976 | 0.93012 | 1.000 | 1.000 | 1a   | 1    |
| 12 | H H <sub>7</sub>   | 0.15259 | 0.86591 | 0.86244 | 1.000 | 1.000 | 1a   | 1    |

=====  
Title CH<sub>5</sub>N<sub>2</sub>EuCl<sub>3</sub> (FAEuCl<sub>3</sub>)

Space group name *P*<sub>1</sub>

Lattice parameters

| a       | b       | c       | alpha   | beta    | gamma   |
|---------|---------|---------|---------|---------|---------|
| 5.63069 | 5.60698 | 5.57930 | 86.0600 | 83.0200 | 86.4000 |

Unit-cell volume = 174.162505 Å<sup>3</sup>

Structure parameters

|   |                    | x       | y       | z       | Occ.  | B     | Site | Sym. |
|---|--------------------|---------|---------|---------|-------|-------|------|------|
| 1 | H H <sub>1</sub>   | 0.60892 | 0.83821 | 0.24794 | 1.000 | 1.000 | 1a   | 1    |
| 2 | H H <sub>2</sub>   | 0.48846 | 0.10834 | 0.37650 | 1.000 | 1.000 | 1a   | 1    |
| 3 | H H <sub>4</sub>   | 0.18521 | 0.15213 | 0.12574 | 1.000 | 1.000 | 1a   | 1    |
| 4 | Eu Eu <sub>1</sub> | 0.87848 | 0.43592 | 0.61074 | 1.000 | 1.000 | 1a   | 1    |
| 5 | C C                | 0.31178 | 0.99476 | 0.11496 | 1.000 | 1.000 | 1a   | 1    |
| 6 | N N                | 0.48260 | 0.97887 | 0.25498 | 1.000 | 1.000 | 1a   | 1    |

|      |                 |         |         |         |       |       |    |   |
|------|-----------------|---------|---------|---------|-------|-------|----|---|
| 7 Cl | Cl <sub>1</sub> | 0.83699 | 0.46935 | 0.11337 | 1.000 | 1.000 | 1a | 1 |
| 8 Cl | Cl <sub>2</sub> | 0.88387 | 0.93622 | 0.60853 | 1.000 | 1.000 | 1a | 1 |
| 9 Cl | Cl <sub>3</sub> | 0.37801 | 0.40806 | 0.61603 | 1.000 | 1.000 | 1a | 1 |
| 10 N | N <sub>2</sub>  | 0.28091 | 0.83774 | 0.96052 | 1.000 | 1.000 | 1a | 1 |
| 11 H | H <sub>6</sub>  | 0.38813 | 0.68428 | 0.93956 | 1.000 | 1.000 | 1a | 1 |
| 12 H | H <sub>7</sub>  | 0.14523 | 0.86755 | 0.85093 | 1.000 | 1.000 | 1a | 1 |

---

Title CH<sub>5</sub>N<sub>2</sub>EuI<sub>3</sub> (FAEuI<sub>3</sub>)

Space group name *P*<sub>1</sub>

Lattice parameters

| a       | b       | c       | alpha   | beta    | gamma   |
|---------|---------|---------|---------|---------|---------|
| 6.24548 | 6.23562 | 6.20891 | 86.0800 | 84.4900 | 87.4500 |

Unit-cell volume = 239.946985 Å<sup>3</sup>

Structure parameters

|      |                 | x       | y       | z       | Occ.  | B     | Site | Sym. |
|------|-----------------|---------|---------|---------|-------|-------|------|------|
| 1 H  | H <sub>1</sub>  | 0.60060 | 0.86879 | 0.22655 | 1.000 | 1.000 | 1a   | 1    |
| 2 H  | H <sub>2</sub>  | 0.47913 | 0.09566 | 0.35112 | 1.000 | 1.000 | 1a   | 1    |
| 3 H  | H <sub>4</sub>  | 0.18550 | 0.10887 | 0.14469 | 1.000 | 1.000 | 1a   | 1    |
| 4 Eu | Eu <sub>1</sub> | 0.87176 | 0.42892 | 0.61033 | 1.000 | 1.000 | 1a   | 1    |
| 5 C  | C               | 0.31409 | 0.98367 | 0.11921 | 1.000 | 1.000 | 1a   | 1    |
| 6 N  | N               | 0.47644 | 0.98243 | 0.23831 | 1.000 | 1.000 | 1a   | 1    |
| 7 I  | I <sub>1</sub>  | 0.84132 | 0.46032 | 0.11088 | 1.000 | 1.000 | 1a   | 1    |
| 8 I  | I <sub>2</sub>  | 0.86999 | 0.93028 | 0.61708 | 1.000 | 1.000 | 1a   | 1    |
| 9 I  | I <sub>3</sub>  | 0.37043 | 0.41635 | 0.61104 | 1.000 | 1.000 | 1a   | 1    |
| 10 N | N <sub>2</sub>  | 0.29292 | 0.84760 | 0.97209 | 1.000 | 1.000 | 1a   | 1    |
| 11 H | H <sub>6</sub>  | 0.40621 | 0.72850 | 0.93417 | 1.000 | 1.000 | 1a   | 1    |
| 12 H | H <sub>7</sub>  | 0.16019 | 0.86002 | 0.88431 | 1.000 | 1.000 | 1a   | 1    |

---

Title CH<sub>6</sub>NEuBr<sub>3</sub> (MAEuBr<sub>3</sub>)

Space group name  $P_1$

Lattice parameters

| a       | b       | c       | alpha   | beta    | gamma   |
|---------|---------|---------|---------|---------|---------|
| 5.77933 | 5.73877 | 5.87569 | 90.0000 | 88.1800 | 90.0000 |

Unit-cell volume = 194.776263 Å<sup>3</sup>

Structure parameters

|    |                    | x       | y       | z       | Occ.  | B     | Site | Sym. |
|----|--------------------|---------|---------|---------|-------|-------|------|------|
| 1  | H H <sub>1</sub>   | 0.34719 | 0.52007 | 0.67165 | 1.000 | 1.000 | 1a   | 1    |
| 2  | H H <sub>2</sub>   | 0.34719 | 0.81523 | 0.67165 | 1.000 | 1.000 | 1a   | 1    |
| 3  | H H <sub>3</sub>   | 0.92760 | 0.51040 | 0.64332 | 1.000 | 1.000 | 1a   | 1    |
| 4  | H H <sub>4</sub>   | 0.92760 | 0.82490 | 0.64332 | 1.000 | 1.000 | 1a   | 1    |
| 5  | H H <sub>5</sub>   | 0.22613 | 0.66765 | 0.88907 | 1.000 | 1.000 | 1a   | 1    |
| 6  | H H <sub>6</sub>   | 0.06262 | 0.66765 | 0.40997 | 1.000 | 1.000 | 1a   | 1    |
| 7  | Eu Eu <sub>1</sub> | 0.59488 | 0.16765 | 0.14433 | 1.000 | 1.000 | 1a   | 1    |
| 8  | C C                | 0.02595 | 0.66765 | 0.59463 | 1.000 | 1.000 | 1a   | 1    |
| 9  | N N                | 0.24795 | 0.66765 | 0.71308 | 1.000 | 1.000 | 1a   | 1    |
| 10 | Br Br <sub>1</sub> | 0.56609 | 0.16765 | 0.64290 | 1.000 | 1.000 | 1a   | 1    |
| 11 | Br Br <sub>3</sub> | 0.56783 | 0.66765 | 0.17757 | 1.000 | 1.000 | 1a   | 1    |
| 12 | Br Br <sub>2</sub> | 0.09259 | 0.16765 | 0.09976 | 1.000 | 1.000 | 1a   | 1    |

=====  
Title CH<sub>6</sub>NEuI<sub>3</sub> (MAEuI<sub>3</sub>)

Space group name  $P_1$

Lattice parameters

| a       | b       | c       | alpha   | beta    | gamma   |
|---------|---------|---------|---------|---------|---------|
| 6.15939 | 6.12197 | 6.24635 | 90.0000 | 87.7500 | 90.0000 |

Unit-cell volume = 235.353282 Å<sup>3</sup>

Structure parameters

|    |                    | x       | y       | z       | Occ.  | B     | Site | Sym. |
|----|--------------------|---------|---------|---------|-------|-------|------|------|
| 1  | H H <sub>1</sub>   | 0.33808 | 0.52925 | 0.67169 | 1.000 | 1.000 | 1a   | 1    |
| 2  | H H <sub>2</sub>   | 0.33808 | 0.80605 | 0.67169 | 1.000 | 1.000 | 1a   | 1    |
| 3  | H H <sub>3</sub>   | 0.94389 | 0.52005 | 0.64616 | 1.000 | 1.000 | 1a   | 1    |
| 4  | H H <sub>4</sub>   | 0.94389 | 0.81525 | 0.64616 | 1.000 | 1.000 | 1a   | 1    |
| 5  | H H <sub>5</sub>   | 0.22310 | 0.66765 | 0.87697 | 1.000 | 1.000 | 1a   | 1    |
| 6  | H H <sub>6</sub>   | 0.07197 | 0.66765 | 0.42609 | 1.000 | 1.000 | 1a   | 1    |
| 7  | Eu Eu <sub>1</sub> | 0.58387 | 0.16765 | 0.13832 | 1.000 | 1.000 | 1a   | 1    |
| 8  | C C                | 0.03636 | 0.66765 | 0.59999 | 1.000 | 1.000 | 1a   | 1    |
| 9  | N N                | 0.24426 | 0.66765 | 0.71090 | 1.000 | 1.000 | 1a   | 1    |
| 10 | I I <sub>1</sub>   | 0.56262 | 0.16765 | 0.63808 | 1.000 | 1.000 | 1a   | 1    |
| 11 | I I <sub>3</sub>   | 0.56516 | 0.66765 | 0.17558 | 1.000 | 1.000 | 1a   | 1    |
| 12 | I I <sub>2</sub>   | 0.08233 | 0.16765 | 0.09963 | 1.000 | 1.000 | 1a   | 1    |

Title CsYbBr<sub>3</sub>

Space group name *P*<sub>1</sub>

Lattice parameters

| a       | b       | c       | alpha   | beta    | gamma   |
|---------|---------|---------|---------|---------|---------|
| 5.03064 | 5.03076 | 5.03210 | 90.0000 | 89.9800 | 90.0000 |

Unit-cell volume = 127.352093 Å<sup>3</sup>

Structure parameters

|   |                    | x       | y       | z       | Occ.  | B     | Site | Sym. |
|---|--------------------|---------|---------|---------|-------|-------|------|------|
| 1 | Yb Yb <sub>1</sub> | 0.49996 | 0.25000 | 0.25184 | 1.000 | 1.000 | 1a   | 1    |
| 2 | Cs Cs              | 0.00002 | 0.75000 | 0.74750 | 1.000 | 1.000 | 1a   | 1    |
| 3 | Br Br <sub>2</sub> | 0.50001 | 0.25000 | 0.75088 | 1.000 | 1.000 | 1a   | 1    |
| 4 | Br Br <sub>1</sub> | 0.49997 | 0.75000 | 0.24917 | 1.000 | 1.000 | 1a   | 1    |
| 5 | Br Br <sub>3</sub> | 0.99998 | 0.25000 | 0.24921 | 1.000 | 1.000 | 1a   | 1    |

---

---

Title CsYbCl<sub>3</sub>

Space group name  $P_1$

Lattice parameters

| a       | b       | c       | alpha   | beta    | gamma   |
|---------|---------|---------|---------|---------|---------|
| 5.29124 | 5.29125 | 5.29162 | 90.0000 | 89.9800 | 90.0000 |

Unit-cell volume = 148.150930 Å<sup>3</sup>

Structure parameters

|                      | x       | y       | z       | Occ.  | B     | Site | Sym. |
|----------------------|---------|---------|---------|-------|-------|------|------|
| 1 Yb Yb <sub>1</sub> | 0.49997 | 0.25000 | 0.25140 | 1.000 | 1.000 | 1a   | 1    |
| 2 Cs Cs              | 0.00002 | 0.75000 | 0.74767 | 1.000 | 1.000 | 1a   | 1    |
| 3 Cl Cl <sub>1</sub> | 0.50001 | 0.25000 | 0.75120 | 1.000 | 1.000 | 1a   | 1    |
| 4 Cl Cl <sub>2</sub> | 0.49997 | 0.75000 | 0.24915 | 1.000 | 1.000 | 1a   | 1    |
| 5 Cl Cl <sub>3</sub> | 0.99997 | 0.25000 | 0.24918 | 1.000 | 1.000 | 1a   | 1    |

---

---

Title CsYbI<sub>3</sub>

Space group name  $P_1$

Lattice parameters

| a       | b       | c       | alpha   | beta    | gamma   |
|---------|---------|---------|---------|---------|---------|
| 6.03180 | 6.03177 | 6.03171 | 90.0000 | 89.9800 | 90.0000 |

Unit-cell volume = 219.448261 Å<sup>3</sup>

Structure parameters

|                      | x       | y       | z       | Occ.  | B     | Site | Sym. |
|----------------------|---------|---------|---------|-------|-------|------|------|
| 1 Yb Yb <sub>1</sub> | 0.49997 | 0.25000 | 0.25145 | 1.000 | 1.000 | 1a   | 1    |
| 2 Cs Cs              | 0.00001 | 0.75000 | 0.74778 | 1.000 | 1.000 | 1a   | 1    |
| 3 I I <sub>1</sub>   | 0.50001 | 0.25000 | 0.75160 | 1.000 | 1.000 | 1a   | 1    |
| 4 I I <sub>3</sub>   | 0.49997 | 0.75000 | 0.24887 | 1.000 | 1.000 | 1a   | 1    |
| 5 I I <sub>2</sub>   | 0.99996 | 0.25000 | 0.24890 | 1.000 | 1.000 | 1a   | 1    |

---

---



Title CH<sub>5</sub>N<sub>2</sub>YbBr<sub>3</sub> (FAYbBr<sub>3</sub>)

Space group name *P*<sub>1</sub>

Lattice parameters

| a       | b       | c       | alpha   | beta    | gamma   |
|---------|---------|---------|---------|---------|---------|
| 5.77653 | 5.74321 | 5.74534 | 85.5700 | 83.3400 | 86.9900 |

Unit-cell volume = 188.571901 Å<sup>3</sup>

Structure parameters

|    |                    | x       | y       | z       | Occ.  | B     | Site | Sym. |
|----|--------------------|---------|---------|---------|-------|-------|------|------|
| 1  | H H <sub>1</sub>   | 0.60572 | 0.84611 | 0.24795 | 1.000 | 1.000 | 1a   | 1    |
| 2  | H H <sub>2</sub>   | 0.48640 | 0.10519 | 0.36964 | 1.000 | 1.000 | 1a   | 1    |
| 3  | H H <sub>4</sub>   | 0.18494 | 0.13896 | 0.12773 | 1.000 | 1.000 | 1a   | 1    |
| 4  | Yb Yb <sub>1</sub> | 0.87062 | 0.44038 | 0.60517 | 1.000 | 1.000 | 1a   | 1    |
| 5  | C C                | 0.31321 | 0.99060 | 0.11717 | 1.000 | 1.000 | 1a   | 1    |
| 6  | N N                | 0.48093 | 0.97991 | 0.25249 | 1.000 | 1.000 | 1a   | 1    |
| 7  | Br Br <sub>1</sub> | 0.83624 | 0.46482 | 0.10696 | 1.000 | 1.000 | 1a   | 1    |
| 8  | Br Br <sub>2</sub> | 0.88197 | 0.94132 | 0.60578 | 1.000 | 1.000 | 1a   | 1    |
| 9  | Br Br <sub>3</sub> | 0.36860 | 0.41980 | 0.60748 | 1.000 | 1.000 | 1a   | 1    |
| 10 | N N <sub>2</sub>   | 0.28707 | 0.83537 | 0.96889 | 1.000 | 1.000 | 1a   | 1    |
| 11 | H H <sub>6</sub>   | 0.39779 | 0.69178 | 0.94870 | 1.000 | 1.000 | 1a   | 1    |
| 12 | H H <sub>7</sub>   | 0.15509 | 0.85718 | 0.86182 | 1.000 | 1.000 | 1a   | 1    |

---

---

Title CH<sub>5</sub>N<sub>2</sub>YbCl<sub>3</sub> (FAYbCl<sub>3</sub>)

Space group name *P*<sub>1</sub>

Lattice parameters

| a       | b       | c       | alpha   | beta    | gamma   |
|---------|---------|---------|---------|---------|---------|
| 5.50725 | 5.46797 | 5.46504 | 84.8100 | 82.5200 | 86.8100 |

Unit-cell volume = 162.341476 Å<sup>3</sup>

Structure parameters

|    |                    | x       | y       | z       | Occ.  | B     | Site | Sym. |
|----|--------------------|---------|---------|---------|-------|-------|------|------|
| 1  | H H <sub>1</sub>   | 0.61696 | 0.83952 | 0.24970 | 1.000 | 1.000 | 1a   | 1    |
| 2  | H H <sub>2</sub>   | 0.49017 | 0.11084 | 0.38107 | 1.000 | 1.000 | 1a   | 1    |
| 3  | H H <sub>4</sub>   | 0.18009 | 0.15355 | 0.12482 | 1.000 | 1.000 | 1a   | 1    |
| 4  | Yb Yb <sub>1</sub> | 0.86935 | 0.43757 | 0.60967 | 1.000 | 1.000 | 1a   | 1    |
| 5  | C C                | 0.31222 | 0.99539 | 0.11523 | 1.000 | 1.000 | 1a   | 1    |
| 6  | N N                | 0.48616 | 0.98058 | 0.25769 | 1.000 | 1.000 | 1a   | 1    |
| 7  | Cl Cl <sub>1</sub> | 0.83370 | 0.46814 | 0.10974 | 1.000 | 1.000 | 1a   | 1    |
| 8  | Cl Cl <sub>2</sub> | 0.87952 | 0.93898 | 0.60796 | 1.000 | 1.000 | 1a   | 1    |
| 9  | Cl Cl <sub>3</sub> | 0.36783 | 0.41569 | 0.61062 | 1.000 | 1.000 | 1a   | 1    |
| 10 | N N <sub>2</sub>   | 0.28555 | 0.83314 | 0.96092 | 1.000 | 1.000 | 1a   | 1    |
| 11 | H H <sub>6</sub>   | 0.39800 | 0.67900 | 0.94455 | 1.000 | 1.000 | 1a   | 1    |
| 12 | H H <sub>7</sub>   | 0.14904 | 0.85901 | 0.84782 | 1.000 | 1.000 | 1a   | 1    |

---

Title CH<sub>5</sub>N<sub>2</sub>YbI<sub>3</sub> (FAYbI<sub>3</sub>)

Space group name *P*<sub>1</sub>

Lattice parameters

| a       | b       | c       | alpha   | beta    | gamma   |
|---------|---------|---------|---------|---------|---------|
| 6.15631 | 6.13494 | 6.11064 | 85.8500 | 84.4400 | 87.6300 |

Unit-cell volume = 228.965068 Å<sup>3</sup>

Structure parameters

|   |                    | x       | y       | z       | Occ.  | B     | Site | Sym. |
|---|--------------------|---------|---------|---------|-------|-------|------|------|
| 1 | H H <sub>1</sub>   | 0.60281 | 0.86586 | 0.23037 | 1.000 | 1.000 | 1a   | 1    |
| 2 | H H <sub>2</sub>   | 0.48010 | 0.09600 | 0.35702 | 1.000 | 1.000 | 1a   | 1    |
| 3 | H H <sub>4</sub>   | 0.18403 | 0.11056 | 0.14537 | 1.000 | 1.000 | 1a   | 1    |
| 4 | Yb Yb <sub>1</sub> | 0.86798 | 0.43472 | 0.60655 | 1.000 | 1.000 | 1a   | 1    |
| 5 | C C                | 0.31422 | 0.98376 | 0.11981 | 1.000 | 1.000 | 1a   | 1    |
| 6 | N N                | 0.47713 | 0.98128 | 0.24234 | 1.000 | 1.000 | 1a   | 1    |

|    |   |                |         |         |         |       |       |    |   |
|----|---|----------------|---------|---------|---------|-------|-------|----|---|
| 7  | I | I <sub>1</sub> | 0.83827 | 0.45847 | 0.10758 | 1.000 | 1.000 | 1a | 1 |
| 8  | I | I <sub>2</sub> | 0.87159 | 0.93700 | 0.61492 | 1.000 | 1.000 | 1a | 1 |
| 9  | I | I <sub>3</sub> | 0.36622 | 0.41997 | 0.60742 | 1.000 | 1.000 | 1a | 1 |
| 10 | N | N <sub>2</sub> | 0.29434 | 0.84422 | 0.97155 | 1.000 | 1.000 | 1a | 1 |
| 11 | H | H <sub>6</sub> | 0.40878 | 0.72243 | 0.93833 | 1.000 | 1.000 | 1a | 1 |
| 12 | H | H <sub>7</sub> | 0.16311 | 0.85715 | 0.87854 | 1.000 | 1.000 | 1a | 1 |

---

Title CH<sub>6</sub>NYbBr<sub>3</sub> (MAYbCl<sub>3</sub>)

Space group name *P*<sub>1</sub>

Lattice parameters

| a       | b       | c       | alpha   | beta    | gamma   |
|---------|---------|---------|---------|---------|---------|
| 5.63937 | 5.60039 | 5.71449 | 90.0000 | 86.9700 | 90.0000 |

Unit-cell volume = 180.226545 Å<sup>3</sup>

Structure parameters

|    |    | x               | y       | z       | Occ.    | B     | Site  | Sym. |   |
|----|----|-----------------|---------|---------|---------|-------|-------|------|---|
| 1  | H  | H <sub>1</sub>  | 0.34747 | 0.51430 | 0.67614 | 1.000 | 1.000 | 1a   | 1 |
| 2  | H  | H <sub>2</sub>  | 0.34747 | 0.81651 | 0.67614 | 1.000 | 1.000 | 1a   | 1 |
| 3  | H  | H <sub>3</sub>  | 0.92547 | 0.50438 | 0.60542 | 1.000 | 1.000 | 1a   | 1 |
| 4  | H  | H <sub>4</sub>  | 0.92547 | 0.82643 | 0.60542 | 1.000 | 1.000 | 1a   | 1 |
| 5  | H  | H <sub>5</sub>  | 0.19599 | 0.66540 | 0.88684 | 1.000 | 1.000 | 1a   | 1 |
| 6  | H  | H <sub>6</sub>  | 0.09167 | 0.66540 | 0.37944 | 1.000 | 1.000 | 1a   | 1 |
| 7  | Yb | Yb <sub>1</sub> | 0.60327 | 0.16540 | 0.12998 | 1.000 | 1.000 | 1a   | 1 |
| 8  | C  | C               | 0.03142 | 0.66540 | 0.56531 | 1.000 | 1.000 | 1a   | 1 |
| 9  | N  | N               | 0.24149 | 0.66540 | 0.70892 | 1.000 | 1.000 | 1a   | 1 |
| 10 | Br | Br <sub>1</sub> | 0.57591 | 0.16540 | 0.62891 | 1.000 | 1.000 | 1a   | 1 |
| 11 | Br | Br <sub>2</sub> | 0.59910 | 0.66540 | 0.14678 | 1.000 | 1.000 | 1a   | 1 |
| 12 | Br | Br <sub>3</sub> | 0.10171 | 0.16540 | 0.10276 | 1.000 | 1.000 | 1a   | 1 |

---

Title CH<sub>6</sub>NYbI<sub>3</sub> (MAYbI<sub>3</sub>)

Space group name  $P_1$

Lattice parameters

| a       | b       | c       | alpha   | beta    | gamma   |
|---------|---------|---------|---------|---------|---------|
| 6.01742 | 5.97497 | 6.07974 | 90.0000 | 86.8900 | 90.0000 |

Unit-cell volume = 218.268442 Å<sup>3</sup>

Structure parameters

|    |                    | x       | y       | z       | Occ.  | B     | Site | Sym. |
|----|--------------------|---------|---------|---------|-------|-------|------|------|
| 1  | H H <sub>1</sub>   | 0.33672 | 0.52371 | 0.67587 | 1.000 | 1.000 | 1a   | 1    |
| 2  | H H <sub>2</sub>   | 0.33672 | 0.80710 | 0.67587 | 1.000 | 1.000 | 1a   | 1    |
| 3  | H H <sub>3</sub>   | 0.94058 | 0.51427 | 0.60840 | 1.000 | 1.000 | 1a   | 1    |
| 4  | H H <sub>4</sub>   | 0.94058 | 0.81654 | 0.60840 | 1.000 | 1.000 | 1a   | 1    |
| 5  | H H <sub>5</sub>   | 0.19319 | 0.66540 | 0.87397 | 1.000 | 1.000 | 1a   | 1    |
| 6  | H H <sub>6</sub>   | 0.09776 | 0.66540 | 0.39586 | 1.000 | 1.000 | 1a   | 1    |
| 7  | Yb Yb <sub>1</sub> | 0.59542 | 0.16540 | 0.12453 | 1.000 | 1.000 | 1a   | 1    |
| 8  | C C                | 0.04018 | 0.66540 | 0.57069 | 1.000 | 1.000 | 1a   | 1    |
| 9  | N N                | 0.23663 | 0.66540 | 0.70639 | 1.000 | 1.000 | 1a   | 1    |
| 10 | I I <sub>2</sub>   | 0.57468 | 0.16540 | 0.62445 | 1.000 | 1.000 | 1a   | 1    |
| 11 | I I <sub>1</sub>   | 0.59930 | 0.66540 | 0.14402 | 1.000 | 1.000 | 1a   | 1    |
| 12 | I I <sub>3</sub>   | 0.09467 | 0.16540 | 0.10361 | 1.000 | 1.000 | 1a   | 1    |

---

---
